# Supplementary material for: Endometrial cell-derived small extracellular vesicle miR-100-5p promotes functions of trophoblast during embryo implantation
Source: PubMed Central journal article supplement (PMC7758458; doi:10.1016/j.omtn.2020.10.043), 2020-11-05
Supplement: mmc1.pdf [file mmc1.pdf]

**OMTN, Volume 23**

**Supplemental Information**

**Endometrial cell-derived small extracellular  
vesicle miR-100-5p promotes functions  
of trophoblast during embryo implantation**

**Qiang Tan, Shuang Shi, Jingjie Liang, Dingren Cao, Shaoyu Wang, and Zhengguang Wang**

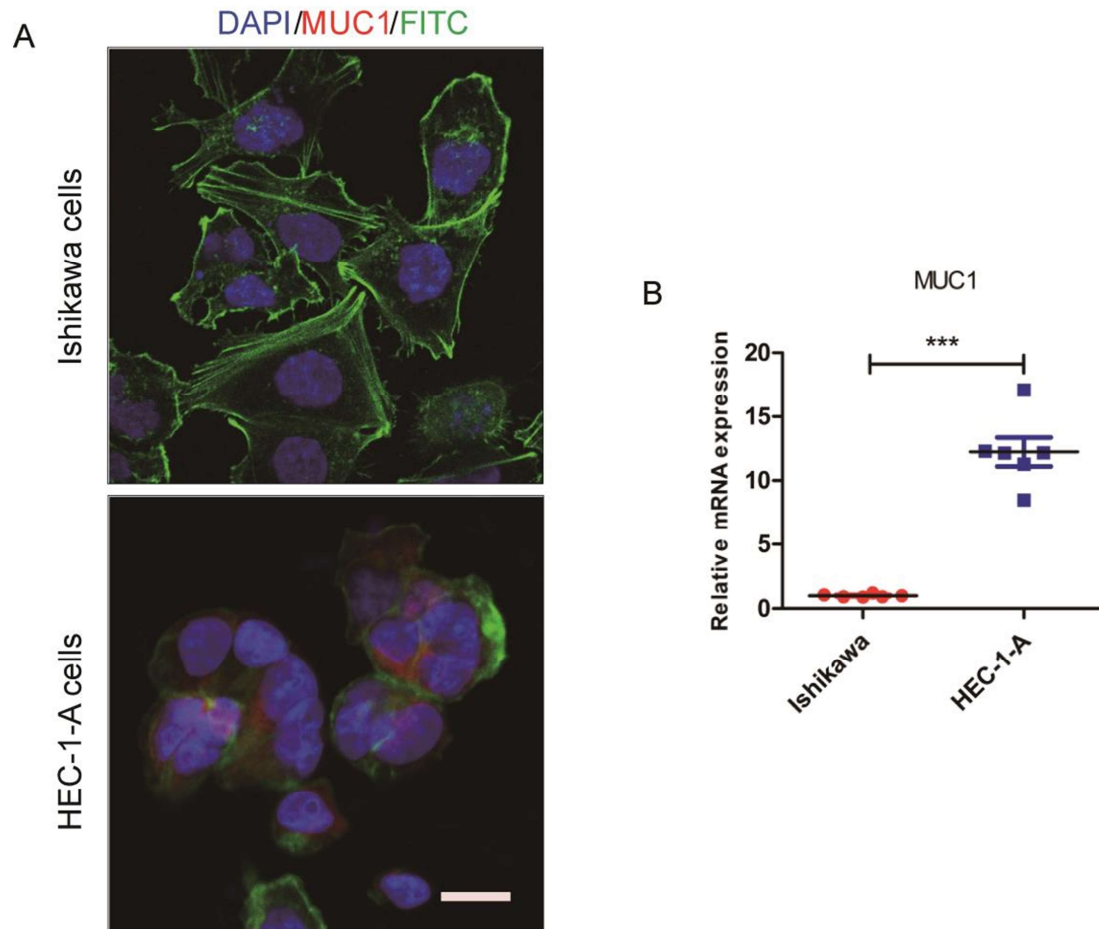

**Figure S1. Ishikawa cells and HEC-1-A cells represent receptive and non-receptive endometrium epithelial cells, respectively. (A)** Immunofluorescence image of Ishikawa and HEC-1-A cells stained with an MUC1 antibody, a molecular marker of uterine receptivity. Nuclei stained using DAPI dye. FITC-conjugated phalloidin was used to label the cytoskeleton. The scale bar = 20 $\mu$ m. **(B)** The mRNA expression level of MUC1 in Ishikawa and HEC-1-A cells was detected by qRT-PCR. (\* $P$ <0.05; \*\* $P$ <0.01; \*\*\* $P$ <0.001)

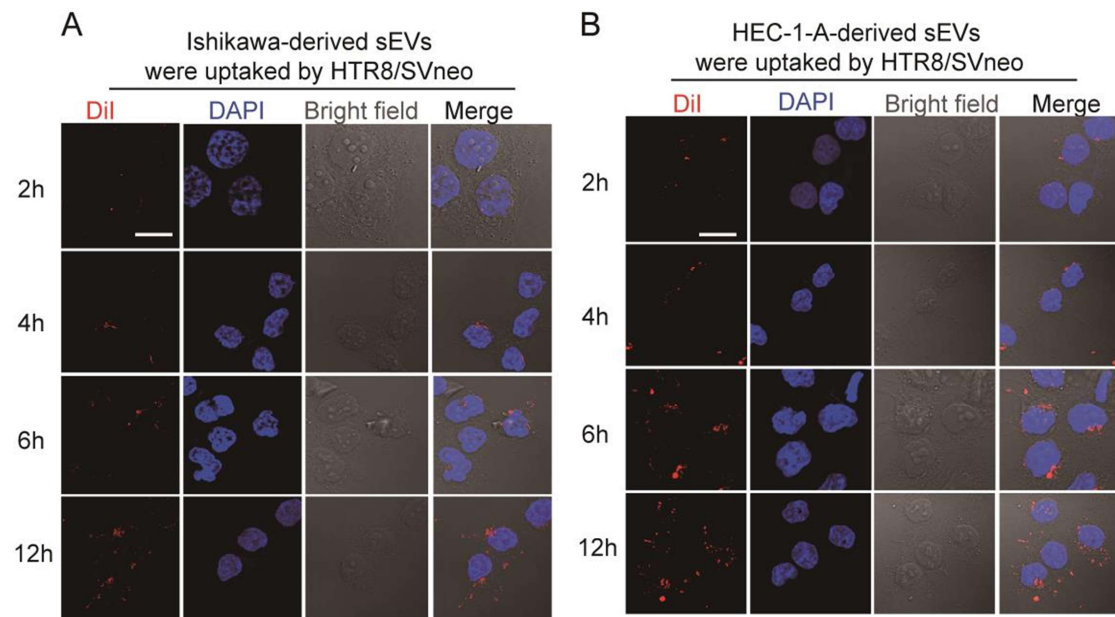

**Figure S2. sEVs derived from endometrium epithelial cells could be uptake by HTR8/SVneo trophoblasts.** sEVs were labeled using DiI dye and incubated with serum-starved trophoblasts for 2, 4, 6 and 12h, respectively. Confocal microscopic images showed uptake of sEVs derived from Ishikawa cells (**A**) and HEC-1-A cells (**B**) by HTR8/SVneo cells in a time-dependent manner. Nuclei stained by DAPI in blue. The scale bar = 20 $\mu$ m.

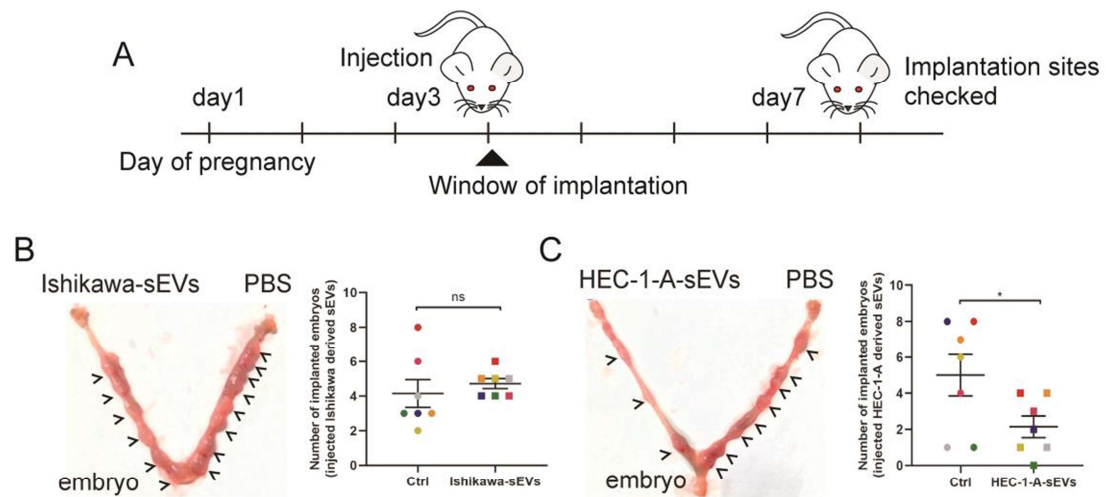

**Figure S3. Endometrial epithelial cells derived sEVs impair embryo implantation.** (A) Schematic diagram showed the female mouse after mating were injected on day3 of pregnancy, and the number of implanted embryos were checked on day7 of pregnancy. (B-C) The number of implanted embryos after injecting Ishikawa or HEC-1-A derived sEVs. PBS was used as a control. (ns: no significant. \* $P < 0.05$ ; \*\* $P < 0.01$ ; \*\*\* $P < 0.001$ )

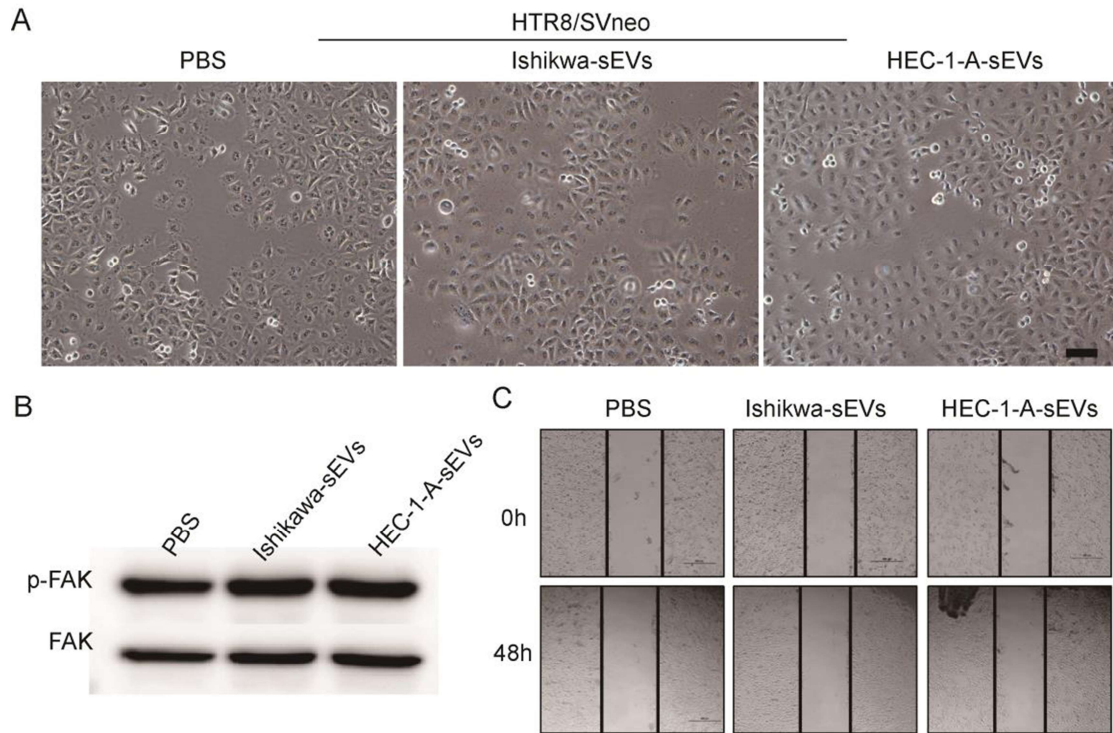

**Figure S4. Growing state of HTR8/SVneo cells after stimulation with PBS, Ishikawa- sEVs, or HEC-1-A- sEVs for 24h.** (A) The images visualized using the optical microscope. The scale bar = 50 $\mu$ m. (B) HTR8/SVneo trophoblasts were serum-starved and treated with PBS, 50 $\mu$ g Ishikawa-sEVs or 50 $\mu$ g HEC-1-A-sEVs. After 48h, the cells were immunoblotted for phosphorylated FAK (P-FAK). (C) Images of wound closure assays performed on HTR8/SVneo cells cultured in serum-free medium supplemented PBS, 50 $\mu$ g Ishikawa-sEVs or 50 $\mu$ g HEC-1-A-sEVs for 48h.

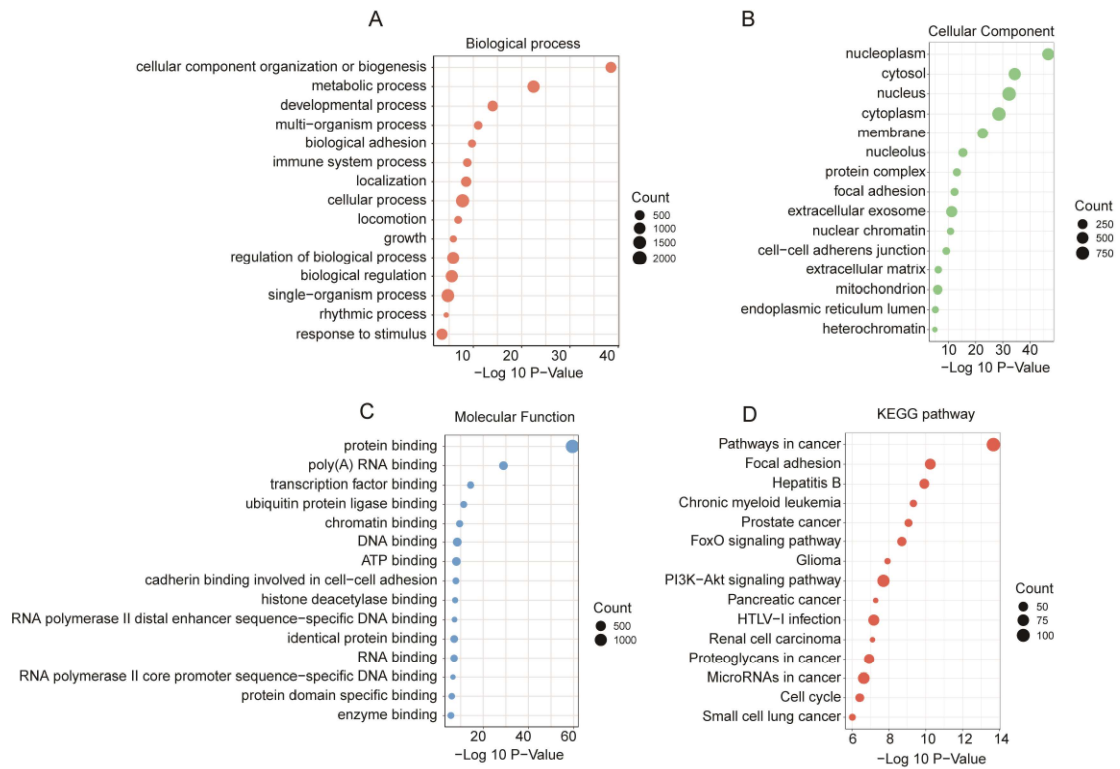

**Figure S5. GO and KEGG analysis of genes, which regulated by the differentially expressed miRNAs between Ishikawa-sEVs and HEC-1-A- sEVs. (A-C) A bubble plot of GOs (Biological Process, Molecular function and Cellular components) enriched. (B) A bubble plot of KEGG pathway enriched.**

**Table S1** MiRNA expression profile in endometrial cells derived exosomes (Ishikawa-sEVs vs. HEC-1-A-sEVs)

**Table S2** Sequences of primers, agomir, and miRNA mimics.

|                              |                                |
|------------------------------|--------------------------------|
| MUC1                         | F: 5'TGCCGCCGAAAGAACTACG3'     |
|                              | R: 5'TGGGGTACTCGCTCATAGGAT3'   |
| GAPDH                        | F: 5'GGAGCGAGATCCCTCCAAAAT3'   |
|                              | R: 5'GGCTGTTGTCATACTTCTCATGG3' |
| miR-100-5p                   | 5'AACCCGTAGATCCGAACTTGTG3'     |
| cel-miR-39                   | 5'TCACCGGGTGTAATCAGCTTG3'      |
| U6                           | 5'AACGAGAAGCGAACCAAAAAA3'      |
| miR-100-5p(antagomir)        | 5'CACAAGUUCGGAUCUACGGGUU3'     |
| miR-100-5p(mimics)           | 5'AACCCGUAGAUCGGAACUUGUG3'     |
|                              | 5'CAAGUUCGGAUCUACGGGUUUU3'     |
| Negative control<br>(mimics) | 5'UUCUCCGAACGUGUCACGUTT3'      |
|                              | 5'ACGUGACACGUUCGGAGAATT3'      |
